# Supplementary material
Source: PubMed Central journal article supplement (PMC3545654)

## Supporting Information

### FIGURES

#### **Figure S1: Control of gene reporter expression on HEK293T transfected cell line**

mRNA from TLR3-, RIG-I- or MDA-5-transfected HEK293T cell lines was extracted and cDNA was synthesized by reverse transcriptase PCR. cDNA was then used in a real-time PCR assay to analyze the expression the gene of interest. Data are presented as arbitrary units and all values normalized to GAPDH transcript used as housekeeping gene. Data represent a pool of 3 independent PCR performed with mRNA from 3 different cell batches.

#### **Figure S2: Within PBMC, mDC are the main producers of IFN- $\beta$ in response to dsRNA activation**

Whole PBMC or depleted of myeloid DC fraction (see “material and methods” section for details) were activated with poly(IC) or poly(AU) as detailed in figure 3A. IFN- $\beta$  production was evaluated by ELISA. Data represent the mean of culture triplicates  $\pm$  SD of a representative experiment of two performed with independent donors.

#### **Figure S3: Supernatants from both pulsed-mDC or –MdDC trigger NK cell activation with comparable efficiency while they do not induced IFN- $\gamma$ .**

**A.** Supernatants from MACS-sorted mDC (BDCA1 and BDCA3) pulsed 4 hours (black histograms) or activated 20 hours (white histograms) with 30  $\mu$ g/mL of either poly(I:C) or poly(A:U) were used to activate  $1 \times 10^6$ /ml MACS-purified human NK cells. After 20h activation, mean fluorescence intensity of CD69 was measured on CD56<sup>+</sup>CD3<sup>-</sup> NK cells by flow cytometry and IFN- $\gamma$  produced in culture supernatant was quantified by ELISA as previously described (Fig.2). Data represent mean  $\pm$  SD of 2 different donors activated with 2 batches of mDC SN. **B.** Supernatants from either  $1 \times 10^6$ /ml *ex vivo* MACS-sorted mDC (striped histogram) or  $1 \times 10^6$ /ml *in vitro* generated MdDC (grey histogram) pulsed 4 hours with

30 µg/mL of either poly(I:C) or poly(A:U) were used in a dose-range to activate  $1 \times 10^6$ /ml MACS-purified NK cells. Data represent mean + SD of 2 different donors activated with 2 batches of mDC or MdDC SN.

**Figure S4: 5'-triphosphate single stranded RNA (3pRNA) activates RIG-I but not TLR3 nor MDA5.**

$4 \times 10^5$ /ml dsRNA-receptors expressing cell lines were stimulated with Lipofectamin 2000® associated 3pRNA. Luciferase activity was measured as described in Supplemental Figure 1A and results are expressed as the ratio between stimulated and non-stimulated cells. Data are from one representative experiment out of 3 (mean + SD of culture triplicates).

# Supplemental FIGURE 1

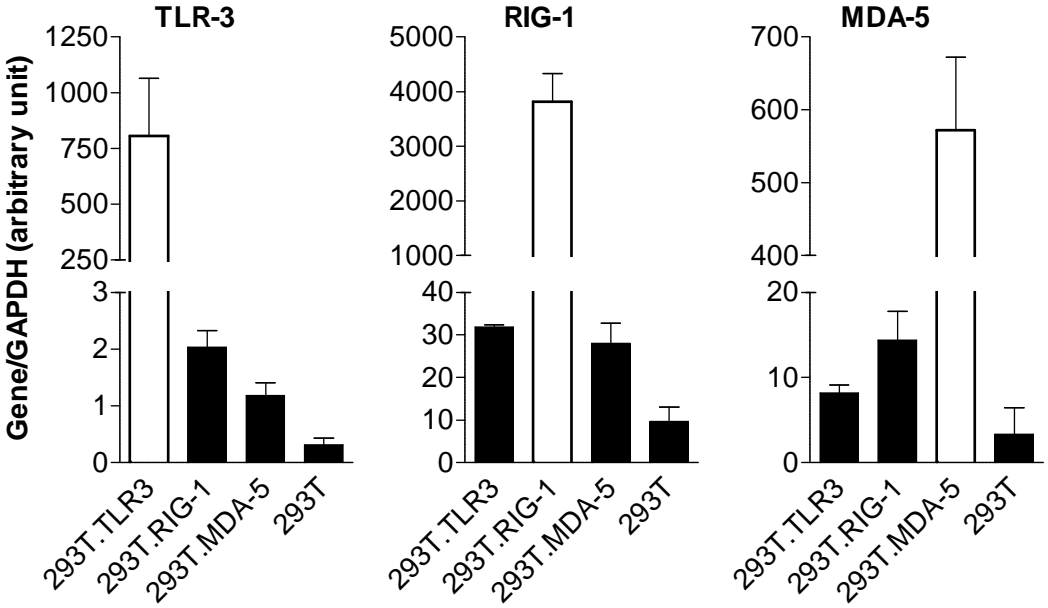

# Supplemental FIGURE 2

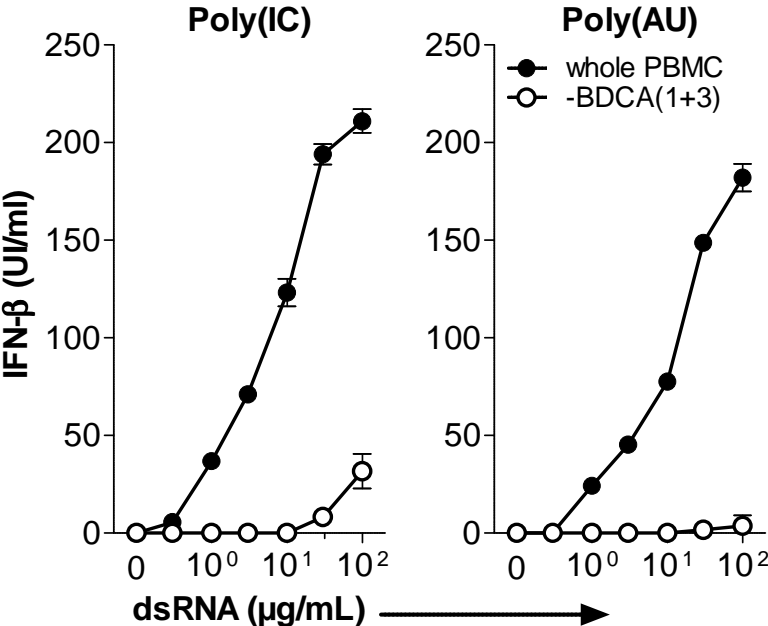

# Supplemental FIGURE 3

**A**

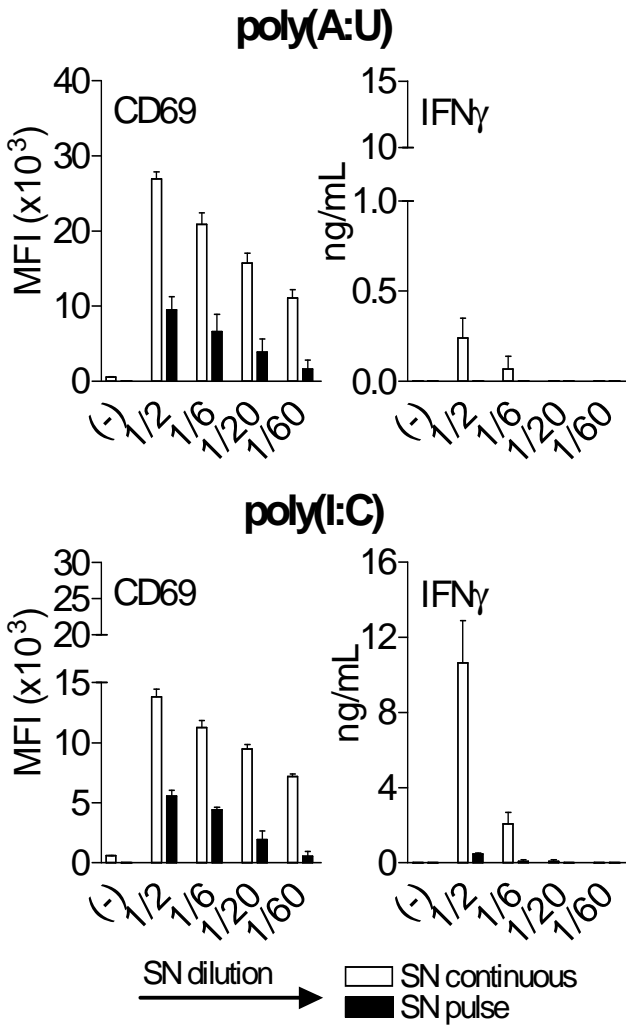

**B**

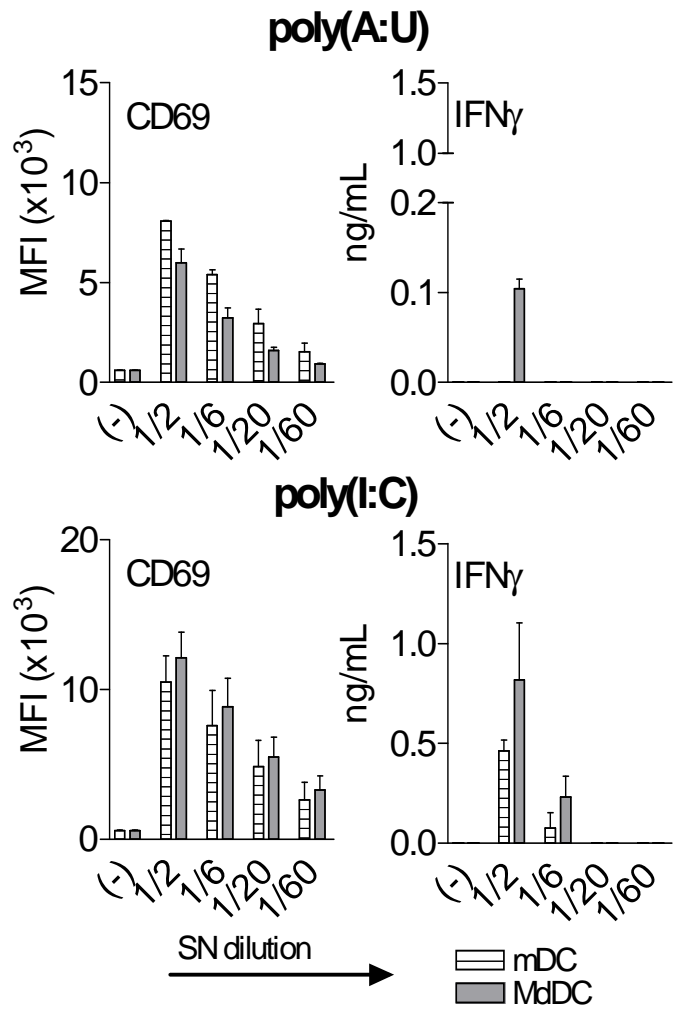

# Supplemental FIGURE 4

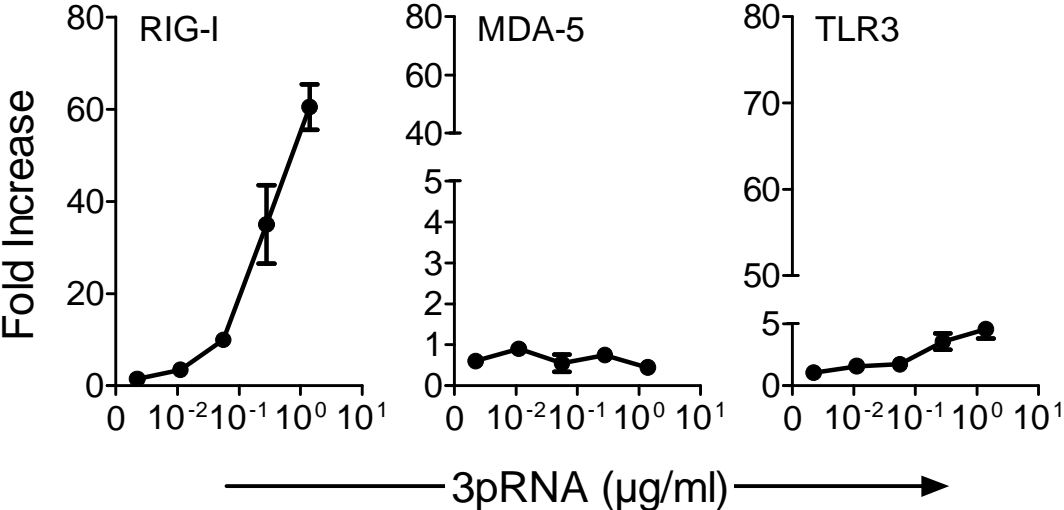

Supplement: NIHMS417008-supplement-Suppl_Data.pdf [file NIHMS417008-supplement-Suppl_Data.pdf]
